# Supplementary material for: Two KaiABC systems control circadian oscillations in one cyanobacterium
Source: Nat Commun. 2024 Sep 3;15:7674. doi: 10.1038/s41467-024-51914-5 (PMC11372060; doi:10.1038/s41467-024-51914-5)
Supplement: Supplementary file 9 — Source Data [file 41467_2024_51914_MOESM9_ESM.xlsx]

## Sheet: Fig. 2a
	The original scans are shown in Figue S5

## Sheet: Fig. 2b
																																	Figure 2b: Interaction analysis of recombinant Kai proteins on native polyacrylamide gels. Black boxes indicate the cropped images shown in the main figure. The brightness and contrast have been adjusted
				Clear Native PAGE													Western Blot, KaiA3-His immunodetection with a monoclonal anti-6x-His Tag antibody conjugated to HRP (MA1-21315-HRP, Thermo Fisher, 1:2000 diluted)

## Sheet: Fig. 2c
																																	Figure 2c: KaiC3 phosphorylation after incubation with various Kai roteins, analysed via LowC SDS-PAGE in Tris-Trcine buffer and Coomassie staining. Black boxes indicate the cropped images shown in the main figure. The brightness and contrast have been adjusted
				upper panel, 0 h														upper panel, 16 h
					lower panel, 0 h													lower panel, 16 h

## Sheet: Fig. 3a
																			Figure 3a: LowC SDS-PAGE gels after Coomassie staining showing the phosphorylation of 3.4 µM KaiC3 after incubation with 7.4 µM KaiB3 and various KaiA3 concentrations at 30°C over time. Black box indicates the cropped image shown in the main figure. The brightness and contrast have been adjusted
	0.0 µM KaiA3								0.5 µM KaiA3
	1.4 µM KaiA3								2.8 µM KaiA3
	4.2 µM KaiA3								8.4 µM KaiA3

## Sheet: Fig.3b
																		Figure 3b: LowC SDS-PAGE gel after Coomassie staining showing the phosphorylation of KaiC3 after incubation with Lambda phosphatase in the presence or absence of phosphatase inhibitors. Black box indicates the cropped image shown in the main figure. The brightness and contrast have been adjusted

## Sheet: Fig.3c, 0.0µM KaiA3
	Assay 1								Assay 2									Assay 3									Figure 3c: LowC SDS-PAGE gels after Coomassie staining showing the phosphorylation of 3.4 µM KaiC3 after incubation with 7.4 µM KaiB3 and 0 µM KaiA3 at 30°C over time. The brightness and contrast have been adjusted
	area defined for densitometric analysis									area defined for densitometric analysis								area defined for densitometric analysis
	230223_Assay1_KC3_densitometric								230301_Assay2_KC3_densitometric									230306_Assay3_KC3_densitometric
	Lane	Band No.	Band %						Lane	Band No.	Band %							Lane	Band No.	Band %
	1	1	17.5538						1	1	15.4772							1	1	18.1136
	1	2	15.975						1	2	24.5164							1	2	24.9133
	1	3	66.4712						1	3	60.0064							1	3	56.9732
	2	1	18.1963						2	1	20.4785							2	1	19.8838
	2	2	18.8143						2	2	20.3727							2	2	22.1473
	2	3	62.9894						2	3	59.1488							2	3	57.9688
	3	1	19.816						3	1	19.534							3	1	18.6497
	3	2	13.2662						3	2	16.0947							3	2	20.8401
	3	3	66.9178						3	3	64.3713							3	3	60.5102
	4	1	17.6637						4	1	19.4558							4	1	19.9216
	4	2	15.5944						4	2	16.1295							4	2	20.383
	4	3	66.742						4	3	64.4147							4	3	59.6954
	5	1	20.0429						5	1	18.9936							5	1	19.5296
	5	2	13.293						5	2	13.1106							5	2	14.6426
	5	3	66.6641						5	3	67.8958							5	3	65.8278
	6	1	17.3831						6	1	18.7768							6	1	19.4879
	6	2	18.3075						6	2	17.6059							6	2	17.6365
	6	3	64.3094						6	3	63.6174							6	3	62.8756
	7	1	20.7247						7	1	20.1522							7	1	18.6049
	7	2	14.4036						7	2	13.4966							7	2	15.1618
	7	3	64.8718						7	3	66.3512							7	3	66.2332
	8	1	18.8887						8	1	18.6084							8	1	18.9065
	8	2	12.0393						8	2	11.4574							8	2	14.4693
	8	3	69.072						8	3	69.9343							8	3	66.6242
	9	1	20.8688						9	1	19.0627							9	1	17.1498
	9	2	10.3183						9	2	11.5279							9	2	12.0996
	9	3	68.8129						9	3	69.4094							9	3	70.7506
	hours	PP-KaiC3	P-KaiC3	NP-KaiC3	PP-KaiC3/total KaiC3				hours	PP-KaiC3	P-KaiC3	NP-KaiC3	PP-KaiC3/total KaiC3					hours	PP-KaiC3	P-KaiC3	NP-KaiC3	PP-KaiC3/total KaiC3
	0	17.5538	15.975	66.4712	0.175538				0	15.4772	24.5164	60.0064	0.154772					0	18.1136	24.9133	56.9732	0.181136
	6	18.1963	18.8143	62.9894	0.181963				6	20.4785	20.3727	59.1488	0.204785					6	19.8838	22.1473	57.9688	0.198838
	12	19.816	13.2662	66.9178	0.19816				12	19.534	16.0947	64.3713	0.19534					12	18.6497	20.8401	60.5102	0.186497
	18	17.6637	15.5944	66.742	0.176637				18	19.4558	16.1295	64.4147	0.194558					18	19.9216	20.383	59.6954	0.199216
	24	20.0429	13.293	66.6641	0.200429				24	18.9936	13.1106	67.8958	0.189936					24	19.5296	14.6426	65.8278	0.195296
	30	17.3831	18.3075	64.3094	0.173831				30	18.7768	17.6059	63.6174	0.187768					30	19.4879	17.6365	62.8756	0.194879
	36	20.7247	14.4036	64.8718	0.207247				36	20.1522	13.4966	66.3512	0.201522					36	18.6049	15.1618	66.2332	0.186049
	42	18.8887	12.0393	69.072	0.188887				42	18.6084	11.4574	69.9343	0.186084					42	18.9065	14.4693	66.6242	0.189065
	48	20.8688	10.3183	68.8129	0.208688				48	19.0627	11.5279	69.4094	0.190627					48	17.1498	12.0996	70.7506	0.171498

## Sheet: Fig.3c, 0.5 µM KaiA3
	Assay 1										Assay 2										Assay 3									Figure 3c: LowC SDS-PAGE gels after Coomassie staining showing the phosphorylation of 3.4 µM KaiC3 after incubation with 7.4 µM KaiB3 and 0.5 µM KaiA3 at 30°C over time. The brightness and contrast have been adjusted
	area defined for densitometric analysis										area defined for densitometric analysis									area defined for densitometric analysis
	230301_Assay1_0.5µM_densitometric										230301_Assay2_0.5µM_densitometric									230306_Assay3_0.5µM_densitometric
	Lane	Band No.	Band %								Lane	Band No.	Band %							Lane	Band No.	Band %
	1	1	20.6318								1	1	15.5784							1	1	14.9979
	1	2	24.251								1	2	25.1642							1	2	28.1926
	1	3	55.1172								1	3	59.2574							1	3	56.8095
	2	1	22.6074								2	1	20.5027							2	1	18.5701
	2	2	33.711								2	2	32.7285							2	2	24.4962
	2	3	43.6815								2	3	46.7688							2	3	56.9337
	3	1	21.3185								3	1	19.0641							3	1	17.5497
	3	2	24.7072								3	2	25.464							3	2	20.2294
	3	3	53.9743								3	3	55.4719							3	3	62.2209
	4	1	22.8453								4	1	19.1377							4	1	19.2686
	4	2	19.0077								4	2	17.8691							4	2	15.2363
	4	3	58.147								4	3	62.9932							4	3	65.4951
	5	1	22.5218								5	1	19.0879							5	1	18.4366
	5	2	12.6991								5	2	13.7986							5	2	15.2001
	5	3	64.7791								5	3	67.1135							5	3	66.3633
	6	1	22.9536								6	1	18.711							6	1	17.1377
	6	2	16.9542								6	2	17.0538							6	2	13.6267
	6	3	60.0922								6	3	64.2352							6	3	69.2356
	7	1	23.9202								7	1	17.0229							7	1	17.2026
	7	2	20.0169								7	2	18.9722							7	2	15.9569
	7	3	56.0629								7	3	64.0049							7	3	66.8405
	8	1	24.7614								8	1	19.1117							8	1	16.5877
	8	2	20.9151								8	2	12.8255							8	2	14.8698
	8	3	54.3235								8	3	68.0628							8	3	68.5425
	9	1	22.3059								9	1	19.3748							9	1	16.9367
	9	2	15.5709								9	2	14.8168							9	2	14.9018
	9	3	62.1232								9	3	65.8084							9	3	68.1615
	hours	PP-KaiC3	P-KaiC3	NP-KaiC3	PP-KaiC3/total KaiC3						hours	PP-KaiC3	P-KaiC3	NP-KaiC3	PP-KaiC3/total KaiC3					hours	PP-KaiC3	P-KaiC3	NP-KaiC3	PP-KaiC3/total KaiC3
	0	20.6318	24.251	55.1172	0.206318						0	15.5784	25.1642	59.2574	0.155784					0	14.9979	28.1926	56.8095	0.149979
	6	22.6074	33.711	43.6815	0.226074						6	20.5027	32.7285	46.7688	0.205027					6	18.5701	24.4962	56.9337	0.185701
	12	21.3185	24.7072	53.9743	0.213185						12	19.0641	25.464	55.4719	0.190641					12	17.5497	20.2294	62.2209	0.175497
	18	22.8453	19.0077	58.147	0.228453						18	19.1377	17.8691	62.9932	0.191377					18	19.2686	15.2363	65.4951	0.192686
	24	22.5218	12.6991	64.7791	0.225218						24	19.0879	13.7986	67.1135	0.190879					24	18.4366	15.2001	66.3633	0.184366
	30	22.9536	16.9542	60.0922	0.229536						30	18.711	17.0538	64.2352	0.18711					30	17.1377	13.6267	69.2356	0.171377
	36	23.9202	20.0169	56.0629	0.239202						36	17.0229	18.9722	64.0049	0.170229					36	17.2026	15.9569	66.8405	0.172026
	42	24.7614	20.9151	54.3235	0.247614						42	19.1117	12.8255	68.0628	0.191117					42	16.5877	14.8698	68.5425	0.165877
	48	22.3059	15.5709	62.1232	0.223059						48	19.3748	14.8168	65.8084	0.193748					48	16.9367	14.9018	68.1615	0.169367

## Sheet: Fig.3c, 1.4 µM KaiA3
	Assay 1.1									Assay 1.2									Assay 2.1									Assay 2.2								Assay 3.1									Assay 3.2
	area defined for densitometric analysis									area defined for densitometric analysis									area defined for densitometric analysis								area defined for densitometric analysis									area defined for densitometric analysis									area defined for densitometric analysis
										For assay 1.2 two bands were analyzed, upper band (PP-Form) and lower band (P+NP-Form)
	230223_Assay1_1.4µM_densitometric									230316_Assay1_1.4µM_densitometric_2									230301_Assay2_1.4µM_densitometric								230316_Assay2_1.4µM_densitometric									230306_Assay3_1.4µM_densitometric									230321_Assay3_1.4µM_densitometric
	Lane	Band No.	Band %							Lane	Band No.	Band %							Lane	Band No.	Band %						Lane	Band No.	Band %							Lane	Band No.	Band %							Lane	Band No.	Band %
	1	1	16.2252							1	1	15.4514							1	1	14.5082						1	1	15.437							1	1	15.6201							1	1	17.8861
	1	2	22.4036							1	2	84.5486							1	2	27.298						1	2	26.7242							1	2	28.1258							1	2	26.216
	1	3	61.3712							2	1	40.2982							1	3	58.1938						1	3	57.8388							1	3	56.2541							1	3	55.8979
	2	1	34.9308							2	2	59.7018							2	1	33.4228						2	1	35.9239							2	1	33.8637							2	1	35.9056
	2	2	33.8241							3	1	22.9886							2	2	33.823						2	2	33.2695							2	2	33.2793							2	2	31.67
	2	3	31.245							3	2	77.0114							2	3	32.7542						2	3	30.8066							2	3	32.857							2	3	32.4244
	3	1	24.2442							4	1	19.7335							3	1	21.6661						3	1	23.6661							3	1	22.4357							3	1	23.6405
	3	2	41.2666							4	2	80.2665							3	2	38.3425						3	2	38.3247							3	2	35.4544							3	2	36.0505
	3	3	34.4892							5	1	24.2413							3	3	39.9914						3	3	38.0092							3	3	42.1099							3	3	40.3091
	4	1	20.0004							5	2	75.7587							4	1	17.7964						4	1	18.0985							4	1	20.2064							4	1	22.5922
	4	2	25.5641							6	1	32.1121							4	2	29.6238						4	2	30.5453							4	2	27.6075							4	2	27.6223
	4	3	54.4355							6	2	67.8879							4	3	52.5798						4	3	51.3562							4	3	52.1861							4	3	49.7854
	5	1	26.1614							7	1	25.8516							5	1	22.2568						5	1	19.2678							5	1	22.1778							5	1	22.2964
	5	2	32.277							7	2	74.1484							5	2	25.6221						5	2	29.0018							5	2	26.5719							5	2	24.5861
	5	3	41.5616							8	1	25.7881							5	3	52.1211						5	3	51.7304							5	3	51.2504							5	3	53.1175
	6	1	27.2531							8	2	74.2119							6	1	25.9719						6	1	25.2757							6	1	26.0034							6	1	24.2469
	6	2	32.7186							9	1	24.9032							6	2	29.2598						6	2	34.8011							6	2	29.0718							6	2	32.5014
	6	3	40.0283							9	2	75.0969							6	3	44.7683						6	3	39.9231							6	3	44.9248							6	3	43.2517
	7	1	22.4711																7	1	21.5486						7	1	23.2579							7	1	23.8401							7	1	22.1325
	7	2	36.9699																7	2	34.9136						7	2	36.6397							7	2	32.2385							7	2	34.5694
	7	3	40.559																7	3	43.5378						7	3	40.1024							7	3	43.9213							7	3	43.2981
	8	1	24.0264																8	1	20.1261						8	1	20.9944							8	1	21.9637							8	1	21.2567
	8	2	38.8115																8	2	31.5127						8	2	35.6001							8	2	30.5495							8	2	31.073
	8	3	37.1621																8	3	48.3612						8	3	43.4054							8	3	47.4868							8	3	47.6703
	9	1	24.1307																9	1	22.7782						9	1	18.0543							9	1	20.5922							9	1	20.4927
	9	2	29.3396																9	2	29.1671						9	2	35.2899							9	2	31.3654							9	2	30.3231
	9	3	46.5297																9	3	48.0546						9	3	46.6558							9	3	48.0424							9	3	49.1842
	hours	PP-KaiC3	P-KaiC3	NP-KaiC3	PP-KaiC3/total KaiC3					hours	PP-KaiC3	NP-KaiC3	PP-KaiC3/total KaiC3						hours	PP-KaiC3	P-KaiC3	NP-KaiC3	PP-KaiC3/total KaiC3				hours	PP-KaiC3	P-KaiC3	NP-KaiC3	PP-KaiC3/total KaiC3					hours	PP-KaiC3	P-KaiC3	NP-KaiC3	PP-KaiC3/total KaiC3					hours	PP-KaiC3	P-KaiC3	NP-KaiC3	PP-KaiC3/total KaiC3
	0	16.2252	22.4036	61.3712	0.162252					0	15.4514	84.5486	0.154514						0	14.5082	27.298	58.1938	0.145082				0	15.437	26.7242	57.8388	0.15437					0	15.6201	28.1258	56.2541	0.156201					0	17.8861	26.216	55.8979	0.178861
	6	34.9308	33.8241	31.245	0.349308					6	40.2982	59.7018	0.402982						6	33.4228	33.823	32.7542	0.334228				6	35.9239	33.2695	30.8066	0.359239					6	33.8637	33.2793	32.857	0.338637					6	35.9056	31.67	32.4244	0.359056
	12	24.2442	41.2666	34.4892	0.242442					12	22.9886	77.0114	0.229886						12	21.6661	38.3425	39.9914	0.216661				12	23.6661	38.3247	38.0092	0.236661					12	22.4357	35.4544	42.1099	0.224357					12	23.6405	36.0505	40.3091	0.236405
	18	20.0004	25.5641	54.4355	0.200004					18	19.7335	80.2665	0.197335						18	17.7964	29.6238	52.5798	0.177964				18	18.0985	30.5453	51.3562	0.180985					18	20.2064	27.6075	52.1861	0.202064					18	22.5922	27.6223	49.7854	0.225922
	24	26.1614	32.277	41.5616	0.261614					24	24.2413	75.7587	0.242413						24	22.2568	25.6221	52.1211	0.222568				24	19.2678	29.0018	51.7304	0.192678					24	22.1778	26.5719	51.2504	0.221778					24	22.2964	24.5861	53.1175	0.222964
	30	27.2531	32.7186	40.0283	0.272531					30	32.1121	67.8879	0.321121						30	25.9719	29.2598	44.7683	0.259719				30	25.2757	34.8011	39.9231	0.252757					30	26.0034	29.0718	44.9248	0.260034					30	24.2469	32.5014	43.2517	0.242469
	36	22.4711	36.9699	40.559	0.224711					36	25.8516	74.1484	0.258516						36	21.5486	34.9136	43.5378	0.215486				36	23.2579	36.6397	40.1024	0.232579					36	23.8401	32.2385	43.9213	0.238401					36	22.1325	34.5694	43.2981	0.221325
	42	24.0264	38.8115	37.1621	0.240264					42	25.7881	74.2119	0.257881						42	20.1261	31.5127	48.3612	0.201261				42	20.9944	35.6001	43.4054	0.209944					42	21.9637	30.5495	47.4868	0.219637					42	21.2567	31.073	47.6703	0.212567
	48	24.1307	29.3396	46.5297	0.241307					48	24.9032	75.0969	0.249031						48	22.7782	29.1671	48.0546	0.227782				48	18.0543	35.2899	46.6558	0.180543					48	20.5922	31.3654	48.0424	0.205922					48	20.4927	30.3231	49.1842	0.204927

## Sheet: Fig.3c, 2.8 µM KaiA3
	Assay 1.1									Assay 1.2								Assay 2.1									Assay 2.2								Assay 3.1							Assay 3.2
	area defined for densitometric analysis									area defined for densitometric analysis								area defined for densitometric analysis									area defined for densitometric analysis								area defined for densitometric analysis							area defined for densitometric analysis
										For assay 1.2 two bands were analyzed, upper band (PP-Form) and lower band (P+NP-Form)
	230223_Assay1_2.8µM_densitometric									230316_Assay1_2.8µM_densitometric_2								230301_Assay2_2.8µM_densitometric									230316_Assay2_2.8µM_densitometric								230306_Assay3_2.8µM_densitometric							230321_Assay3_2.8µM_densitometric
	Lane	Band No.	Band %							Lane	Band No.	Band %						Lane	Band No.	Band %							Lane	Band No.	Band %						Lane	Band No.	Band %					Lane	Band No.	Band %
	1	1	16.2937							1	1	17.9506						1	1	17.752							1	1	16.3033						1	1	16.8505					1	1	17.7722
	1	2	17.9741							1	2	82.0494						1	2	24.5949							1	2	83.6967						1	2	26.7751					1	2	25.9015
	1	3	65.7322							2	1	42.3645						1	3	57.6531							2	1	47.7141						1	3	56.3745					1	3	56.3263
	2	1	45.152							2	2	57.6355						2	1	43.4354							2	2	52.2859						2	1	43.2745					2	1	43.8353
	2	2	26.519							3	1	29.6238						2	2	27.7627							3	1	33.5186						2	2	27.0999					2	2	25.2058
	2	3	28.3289							3	2	70.3762						2	3	28.8019							3	2	66.4814						2	3	29.6257					2	3	30.9589
	3	1	30.7082							4	1	29.4755						3	1	31.1897							4	1	24.7581						3	1	30.6394					3	1	31.8534
	3	2	44.3548							4	2	70.5245						3	2	39.4126							4	2	75.2419						3	2	41.4496					3	2	42.573
	3	3	24.937							5	1	32.8375						3	3	29.3977							5	1	31.4034						3	3	27.911					3	3	25.5735
	4	1	26.4513							5	2	67.1625						4	1	28.3724							5	2	68.5966						4	1	24.5601					4	1	27.131
	4	2	34.4411							6	1	33.9671						4	2	31.3371							6	1	34.9477						4	2	34.1241					4	2	33.9843
	4	3	39.1076							6	2	66.0329						4	3	40.2905							6	2	65.0523						4	3	41.3158					4	3	38.8847
	5	1	32.9442							7	1	31.1954						5	1	29.192							7	1	30.5979						5	1	29.6557					5	1	30.6036
	5	2	30.5792							7	2	68.8046						5	2	29.6045							7	2	69.4021						5	2	31.042					5	2	27.6019
	5	3	36.4766							8	1	31.2676						5	3	41.2035							8	1	29.66						5	3	39.3023					5	3	41.7944
	6	1	33.0178							8	2	68.7324						6	1	32.2605							8	2	70.34						6	1	33.6341					6	1	32.7335
	6	2	36.1256							9	1	32.4551						6	2	32.953							9	1	31.302						6	2	31.2136					6	2	33.2954
	6	3	30.8565							9	2	67.5449						6	3	34.7865							9	2	68.698						6	3	35.1523					6	3	33.9711
	7	1	33.399															7	1	31.9378															7	1	30.0047					7	1	31.1916
	7	2	37.4124															7	2	32.2131															7	2	36.656					7	2	35.8753
	7	3	29.1885															7	3	35.8491															7	3	33.3393					7	3	32.9331
	8	1	31.5913															8	1	31.5511															8	1	30.2162					8	1	29.8971
	8	2	37.0081															8	2	32.2506															8	2	33.5695					8	2	32.9868
	8	3	31.4006															8	3	36.1983															8	3	36.2143					8	3	37.1161
	9	1	32.4331															9	1	31.8644															9	1	28.4026					9	1	32.6209
	9	2	32.3756															9	2	32.3587															9	2	30.972					9	2	31.7655
	9	3	35.1913															9	3	35.7768															9	3	40.6254					9	3	35.6137
	hours	PP-KaiC3	P-KaiC3	NP-KaiC3	PP-KaiC3/total KaiC3					hours	PP-KaiC3	NP-KaiC3	PP-KaiC3/total KaiC3					hours	PP-KaiC3	P-KaiC3	NP-KaiC3	PP-KaiC3/total KaiC3					hours	PP-KaiC3	NP-KaiC3	PP-KaiC3/total KaiC3					hours	PP-KaiC3	P-KaiC3	NP-KaiC3	PP-KaiC3/total KaiC3			hours	PP-KaiC3	P-KaiC3	NP-KaiC3	PP-KaiC3/total KaiC3
	0	16.2937	17.9741	65.7322	0.162937					0	17.9506	82.0494	0.179506					0	17.752	24.5949	57.6531	0.17752					0	16.3033	83.6967	0.163033					0	16.8505	26.7751	56.3745	0.168505			0	17.7722	25.9015	56.3263	0.177722
	6	45.152	26.519	28.3289	0.45152					6	42.3645	57.6355	0.423645					6	43.4354	27.7627	28.8019	0.434354					6	47.7141	52.2859	0.477141					6	43.2745	27.0999	29.6257	0.432745			6	43.8353	25.2058	30.9589	0.438353
	12	30.7082	44.3548	24.937	0.307082					12	29.6238	70.3762	0.296238					12	31.1897	39.4126	29.3977	0.311897					12	33.5186	66.4814	0.335186					12	30.6394	41.4496	27.911	0.306394			12	31.8534	42.573	25.5735	0.318534
	18	26.4513	34.4411	39.1076	0.264513					18	29.4755	70.5245	0.294755					18	28.3724	31.3371	40.2905	0.283724					18	24.7581	75.2419	0.247581					18	24.5601	34.1241	41.3158	0.245601			18	27.131	33.9843	38.8847	0.27131
	24	32.9442	30.5792	36.4766	0.329442					24	32.8375	67.1625	0.328375					24	29.192	29.6045	41.2035	0.29192					24	31.4034	68.5966	0.314034					24	29.6557	31.042	39.3023	0.296557			24	30.6036	27.6019	41.7944	0.306036
	30	33.0178	36.1256	30.8565	0.330178					30	33.9671	66.0329	0.339671					30	32.2605	32.953	34.7865	0.322605					30	34.9477	65.0523	0.349477					30	33.6341	31.2136	35.1523	0.336341			30	32.7335	33.2954	33.9711	0.327335
	36	33.399	37.4124	29.1885	0.33399					36	31.1954	68.8046	0.311954					36	31.9378	32.2131	35.8491	0.319378					36	30.5979	69.4021	0.305979					36	30.0047	36.656	33.3393	0.300047			36	31.1916	35.8753	32.9331	0.311916
	42	31.5913	37.0081	31.4006	0.315913					42	31.2676	68.7324	0.312676					42	31.5511	32.2506	36.1983	0.315511					42	29.66	70.34	0.2966					42	30.2162	33.5695	36.2143	0.302162			42	29.8971	32.9868	37.1161	0.298971
	48	32.4331	32.3756	35.1913	0.324331					48	32.4551	67.5449	0.324551					48	31.8644	32.3587	35.7768	0.318644					48	31.302	68.698	0.31302					48	28.4026	30.972	40.6254	0.284026			48	32.6209	31.7655	35.6137	0.326209
[truncated: 1 more columns]

## Sheet: Fig.3c, 4.2 µM KaiA3
	Assay 1								Assay 2										Assay 3										Figure 3c: LowC SDS-PAGE gels after Coomassie staining showing the phosphorylation of 3.4 µM KaiC3 after incubation with 7.4 µM KaiB3 and 4.2 µM KaiA3 at 30°C over time. The brightness and contrast have been adjusted
																			sample lane 4: error during application, mix up with assay 3, 18h sample of 8.4 µM KaiA3! (see gel next sheet)
		area defined for densitometric analysis							area defined for densitometric analysis										area defined for densitometric analysis
	230223_Assay1_4.2µM_densitometric								230301_Assay2_4.2µM_densitometric										230306_Assay3_4.2µM_densitometric
	Lane	Band No.	Band %						Lane	Band No.	Band %								Lane	Band No.	Band %
	1	1	16.9207						1	1	17.2455								1	1	18.5308
	1	2	24.6529						1	2	26.647								1	2	27.6816
	1	3	58.4264						1	3	56.1075								1	3	53.7876
	2	1	51.5423						2	1	48.4955								2	1	51.9765
	2	2	21.7831						2	2	23.2383								2	2	21.9943
	2	3	26.6746						2	3	28.2662								2	3	26.0293
	3	1	41.6604						3	1	40.0792								3	1	41.337
	3	2	34.3426						3	2	36.8937								3	2	37.5857
	3	3	23.9971						3	3	23.0272								3	3	21.0773
	4	1	36.0196						4	1	32.4001								4	1	60.8835	mix up with assay 3, 18h sample of 8.4 µM KaiA3!
	4	2	38.8801						4	2	39.4738								4	2	19.9071
	4	3	25.1003						4	3	28.1261								4	3	19.2094
	5	1	36.2934						5	1	35.9437								5	1	36.4784
	5	2	37.085						5	2	35.5496								5	2	33.6583
	5	3	26.6215						5	3	28.5068								5	3	29.8633
	6	1	38.3901						6	1	37.7727								6	1	35.817
	6	2	34.7521						6	2	36.4719								6	2	36.8419
	6	3	26.8578						6	3	25.7554								6	3	27.3411
	7	1	37.8366						7	1	36.9183								7	1	37.4129
	7	2	37.0357						7	2	37.772								7	2	37.5843
	7	3	25.1277						7	3	25.3098								7	3	25.0028
	8	1	36.3051						8	1	37.2987								8	1	37.6523
	8	2	38.0888						8	2	38.076								8	2	37.9935
	8	3	25.6061						8	3	24.6253								8	3	24.3542
	9	1	41.7389						9	1	37.312								9	1	36.518
	9	2	36.0859						9	2	38.8295								9	2	39.1001
	9	3	22.1752						9	3	23.8585								9	3	24.3819
	hours	PP-KaiC3	P-KaiC3	NP-KaiC3	PP-KaiC3/total KaiC3				hours	PP-KaiC3	P-KaiC3	NP-KaiC3	PP-KaiC3/total KaiC3						hours	PP-KaiC3	P-KaiC3	NP-KaiC3	PP-KaiC3/total KaiC3
	0	16.9207	24.6529	58.4264	0.169207				0	17.2455	26.647	56.1075	0.172455						0	18.5308	27.6816	53.7876	0.185308
	6	51.5423	21.7831	26.6746	0.515423				6	48.4955	23.2383	28.2662	0.484955						6	51.9765	21.9943	26.0293	0.519765
	12	41.6604	34.3426	23.9971	0.416604				12	40.0792	36.8937	23.0272	0.400792						12	41.337	37.5857	21.0773	0.41337
	18	36.0196	38.8801	25.1003	0.360197				18	32.4001	39.4738	28.1261	0.324001						18	34.9292	37.9421	27.1288	0.349292	values taken from assay 3, 18 h, 8.4 µM KaiA3
	24	36.2934	37.085	26.6215	0.362934				24	35.9437	35.5496	28.5068	0.359437						24	36.4784	33.6583	29.8633	0.364784
	30	38.3901	34.7521	26.8578	0.383901				30	37.7727	36.4719	25.7554	0.377727						30	35.817	36.8419	27.3411	0.35817
	36	37.8366	37.0357	25.1277	0.378366				36	36.9183	37.772	25.3098	0.369183						36	37.4129	37.5843	25.0028	0.374129
	42	36.3051	38.0888	25.6061	0.363051				42	37.2987	38.076	24.6253	0.372987						42	37.6523	37.9935	24.3542	0.376523
	48	41.7389	36.0859	22.1752	0.417389				48	37.312	38.8295	23.8585	0.37312						48	36.518	39.1001	24.3819	0.36518

[truncated: 20 more sheets: Fig. 3c, 8.4 µM KaiA3, Fig.3c,statistics , Fig.3d, 25 °C, Fig. 3d, 30 °C, Fig. 3d, 35 °C, Fig.3d, statistics, Fig. 4, Fig. 5i, Fig. 5j, Fig. 6, Fig. 7a, Fig. 7b, Fig. 7c, Fig. 7d, Fig. S1b, Fig. S1c, Fig. S6, Fig. S9a, Fig. S9b, Fig. S11]
